## Childhood location correlates with epigenetic age and methylation stability in British-Bangladeshi migrants

Reinhard Stöger<sup>1\*</sup>, Minseung Choi<sup>2</sup>, Gregory Leeman<sup>1#</sup>, Richard D. Emes<sup>3,4</sup>,  
Khurshida Begum<sup>5</sup>, Philippa Melamed<sup>6</sup>, Gillian R. Bentley<sup>5,7</sup>

<sup>1</sup> School of Biosciences, University of Nottingham, LE12 5RD, United Kingdom

<sup>2</sup> School of Medicine, Stanford University, USA

<sup>3</sup> School of Veterinary Medicine and Science, University of Nottingham, LE12 5RD, United Kingdom.

<sup>4</sup> Advanced Data Analysis Centre, University of Nottingham, LE12 5RD, United Kingdom.

<sup>5</sup> Department of Anthropology, Durham University, Durham, United Kingdom

<sup>6</sup> Faculty of Biology, Technion-Israel Institute of Technology, Haifa, Israel

<sup>7</sup> Wolfson Research Institute for Health and Wellbeing, Durham University, Durham, United Kingdom

**E-Mail addresses:** RS: [reinhard.stoger@nottingham.ac.uk](mailto:reinhard.stoger@nottingham.ac.uk); MS: [minseung@stanford.edu](mailto:minseung@stanford.edu); GL: [gregoryleeman@outlook.com](mailto:gregoryleeman@outlook.com); RDE: [richard.emes@nottingham.ac.uk](mailto:richard.emes@nottingham.ac.uk); KB: [khurshida.begum@qmul.ac.uk](mailto:khurshida.begum@qmul.ac.uk); PM: [philippa@tx.technion.ac.il](mailto:philippa@tx.technion.ac.il); GRB: [g.r.bentley@durham.ac.uk](mailto:g.r.bentley@durham.ac.uk)

**\*Corresponding author:** Reinhard Stöger, E-mail: [reinhard.stoger@nottingham.ac.uk](mailto:reinhard.stoger@nottingham.ac.uk)

1 **Abstract**

2 **Background**

3 Migration from one environment to another often causes marked changes in developmental  
4 conditions. Here we compare epigenetic ageing and stability of the epigenetic maintenance  
5 system among British-Bangladeshi women who grew up in Bangladesh (adult migrants),  
6 where there are higher pathogen loads and poorer health care, to second-generation  
7 Bangladeshis who grew up in the UK. In our previous studies of these migrants, those who  
8 spent their childhoods in Bangladesh also had lower levels of reproductive hormones and a  
9 shorter reproductive lifespan compared to those who grew up in the UK, suggesting life  
10 history trade-offs during development. In the present study, we hypothesised that women  
11 who grew up in Bangladesh would have *i*) an older epigenetic/biological age compared to  
12 the women with a childhood in the UK and *ii*) that differences in the pace of epigenetic  
13 ageing might also be reflected by altered stability of DNA methylation marks.

14 **Results**

15 Illumina EPIC array methylation data from buccal tissue was used to establish epigenetic  
16 age estimates from 15 adult migrants and 11 second-generation migrants, aged 18-35  
17 years. Using residuals from linear regression of DNA methylation-based biological age  
18 (DNAm age) on the chronological age, the results showed significant differences ( $p=0.016$ )  
19 in epigenetic age estimates: women whose childhood was in Bangladesh are on average  
20 6.02 ( $\pm 2.34$ ) years older, than those who grew up in London. We further investigated the  
21 efficiency of the epigenetic maintenance system which purportedly is reflected by epigenetic  
22 clocks. Methylation states of CpGs at the *LHCGR/LHR* locus, which contributes to Horvath's  
23 multi tissue epigenetic clock were evaluated. Based on the Ratio of Concordance  
24 Preference (RCP) approach that uses double-stranded methylation data, we find that  
25 maintenance of epigenetic information is more stable in women who grew up in Bangladesh.

26 **Conclusions**

27 The work supports earlier findings that adverse childhood environments lead to phenotypic  
28 life history trade-offs. The data indicate that childhood environments can induce subtle  
29 changes to the epigenetic maintenance system that are detectable long after exposure  
30 occurred. The implication of such a finding warrants further investigation as it implies that a  
31 less flexible epigenetic memory system established early in life could reduce the capacity to  
32 respond to different environmental conditions in adult life.

33 **Keywords**

34 Childhood, migrants, epigenetic age, RCP values, epigenetic stability, DNA methylation,  
35 accelerated ageing, Bangladesh, UK.

36

## 37 **Background**

38 Reproductive lifespans vary among individuals. Genetic variants associated with these  
39 complex traits, which include timing of puberty, age at first birth and age at menopause are  
40 closely related to fitness and undergo purifying selection [1,2]. The genetic architecture of  
41 reproductive ageing has been investigated largely in women of European ancestry.  
42 However, a limited number of studies in other populations suggests shared genetic  
43 underpinnings of these reproductive phenotypes, albeit with noticeable variations in effect  
44 allele frequencies and effect estimates in women of different ethnic groups [3–5].  
45 Environmental exposures likely contribute to variations in heritability estimates and the  
46 phenotypic heterogeneity detected within and across different ethnic populations [6,7].

47

48 Our earlier work identified strong correlations between childhood environmental conditions  
49 and adult reproductive function [8–10]. In particular, Bangladeshi women who migrated as  
50 young adults to London, have lower levels of reproductive steroids when compared to  
51 British-Bangladeshi women who moved to the UK prior to the age of eight and women who  
52 were born in London to first-generation Bangladeshi immigrants [7,9–11]. An upbringing in  
53 Bangladesh is generally associated with a shortened reproductive lifespan, while its duration  
54 is longer for women with Bangladeshi ancestry, whose childhoods were spent in London [9].  
55 Timing of reproductive functions across the life course correlates with the rate of ageing in  
56 other body systems [12].

57

58 Geographically and culturally the British-Bangladeshis women in these studies have a  
59 comparable background. They are all ethnic Bengalis and originally stem from a relatively  
60 affluent middle-class population in the northeast of Bangladesh and now live in East London.  
61 A possible environmental factor that distinguishes between the two childhood locations is the  
62 exposure to higher and recurrent infectious disease loads in Bangladesh [13–15]. Indeed, by  
63 mimicking early-life immune challenges in a mouse model, we replicated some of the distinct  
64 reproductive phenotypes characteristic of women with a childhood in Bangladesh, in  
65 including delayed onset of puberty lower ovarian reserve [16].

66

67 At the cellular level, environmental factors influence the chromatin state of the genome [17].  
68 Stored as epigenetic information, cells have the capacity to retain some memory of past  
69 developmental and environmental conditions [18]. Methylation of genomic DNA is part of the  
70 epigenetic information storage system in mammalian cells where it is primarily confined to  
71 cytosines of CpG dinucleotides [19]. Methylation levels of discrete CpG sites have been

72 used to develop remarkably accurate estimators of age. Such ‘epigenetic clocks’ link  
73 developmental and maintenance processes to biological ageing [reviewed in [20]]. Pace of  
74 ageing can vary and result in a mismatch between chronological and biological age of an  
75 individual [21].

76

77 Here, we explore the possible association between chronological age, biological ageing and  
78 an epigenetic maintenance system in Bangladeshi women of prime reproductive age (18-35  
79 years old). The women of this study live within the same ethnic community in London but  
80 can be divided into two groups: those with a childhood in the UK, and those with a childhood  
81 in Sylhet, a city in the northeast region of Bangladesh. Using buccal cell DNA from these  
82 London-based Bangladeshi women, we recently identified genome-wide, altered DNA  
83 methylation levels between the two groups [16]. Since these DNA methylation  
84 measurements were generated on the MethylationEpic array platform, we re-examined the  
85 data using ‘Horvath’s clock’, a multi-tissue age-estimator with a robust relationship between  
86 chronological age and DNA methylation-based (DNAm) age [22].

87

## 88 **Results and Discussion**

### 89 **Accelerated DNAm Age measured with Horvath’s epigenetic clock**

90 We find that the correlation between chronological age and DNAm age does not differ  
91 significantly between women who grew up the UK (‘UK’ group; n=11) and women who grew  
92 up in Bangladesh (‘Bangladesh’ group; n=15). That is, chronological age affects DNAm age  
93 in a similar way in both groups (Additional file 1). However, regression analysis showed that  
94 the y-intercepts of the UK and Bangladeshi groups differ significantly ( $p=0.0083$ ) / Additional  
95 file 1). This suggested that a childhood in Bangladesh correlates with DNAm Age predictions  
96 that differ noticeable when compared with epigenetic age estimates for women of the UK  
97 group.

98 The tick rate of epigenetic clocks is increased by many different environmental factors,  
99 including psychological traumas, smoking, asthma, alcohol, infections and hormonal  
100 changes following menopause [23–26]. Such acceleration of epigenetic age is best  
101 measured by residuals obtained from regressing DNAm age on chronological age [22].

102 Indeed, the pace of epigenetic ageing is accelerated in women with a childhood in  
103 Bangladesh and overall differs significantly from the UK group ( $p=0.016$ ) (Figure 1). This  
104 altered pace of biological ageing is consistent with our previous observations that women  
105 who grow up in Bangladesh have a shorter reproductive lifespan and chronically lower levels  
106 of reproductive hormones [9,13,15]; reviewed in [7]. Although our finding of accelerated

107 epigenetic ageing rests on a small number of sampled individuals, it highlights the limited  
108 utility of epigenetic clocks as a tool to determine the age – and consequently eligibility  
109 considerations - of asylum-seekers [27].  
110

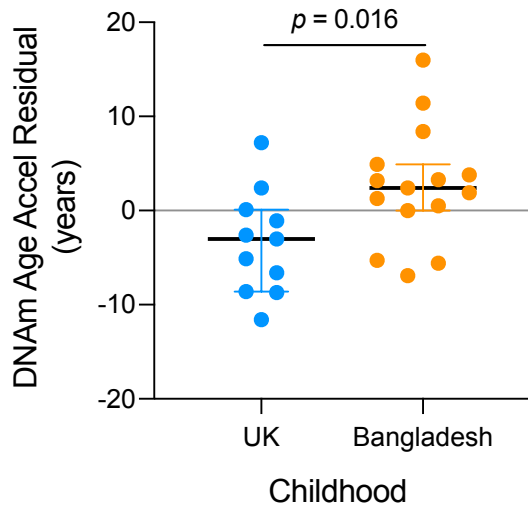

111  
112

### Fig. 1 Differences in pace of epigenetic ageing

114 Plot of DNAm Age Accel Residuals, with each data point representing an individual. The  
115 colour indicates the corresponding dataset: blue = childhood in UK, orange = childhood in  
116 Bangladesh. The median is indicated by a horizontal line with upper and lower hinges  
117 representing the 25th and 75th percentiles. A positive or negative value indicates that the  
118 estimated epigenetic/biological age of the sample is higher or lower, respectively, than  
119 expected based on chronological age.

120

### Epigenetic stability of a clock locus

122 The tick rate of Horvath's epigenetic clock is thought to reflect the rate at which work is done  
123 to maintain epigenetic stability [20,22]. It is possible to infer epigenetic stability by analysing  
124 double-stranded DNA methylation data with a new metric, Ratio of Concordance Preference  
125 (RCP) [28]. We used the RCP metric to estimate epigenetic stability at the *Luteinizing*  
126 *Hormone/Choriogonadotropin Receptor (LHCGR/LHR)* gene, which plays an important role  
127 in reproductive function. The *LHCGR* locus contains a CpG site, which contributes to  
128 Horvath's DNAm Age clock [22].

129 We find that RCP estimates are generally higher for the 'Bangladeshi' group of women  
130 (Figure 2). Higher RCP estimates indicate higher levels of epigenetic stability [28]. That is,  
131 the methylation states of CpGs at *LHCGR* locus are more often identical on the two strands

132 of individual DNA molecules of ‘Bangladeshi’ individuals when compared to ‘UK’ individuals.  
133 We note that the RCP estimates are based on a relatively small number of data points  
134 (Additional file 1), yet they are sufficient to indicate subtle differences in the workings of the  
135 epigenetic maintenance system between two groups of women who appear to age at  
136 different rates.

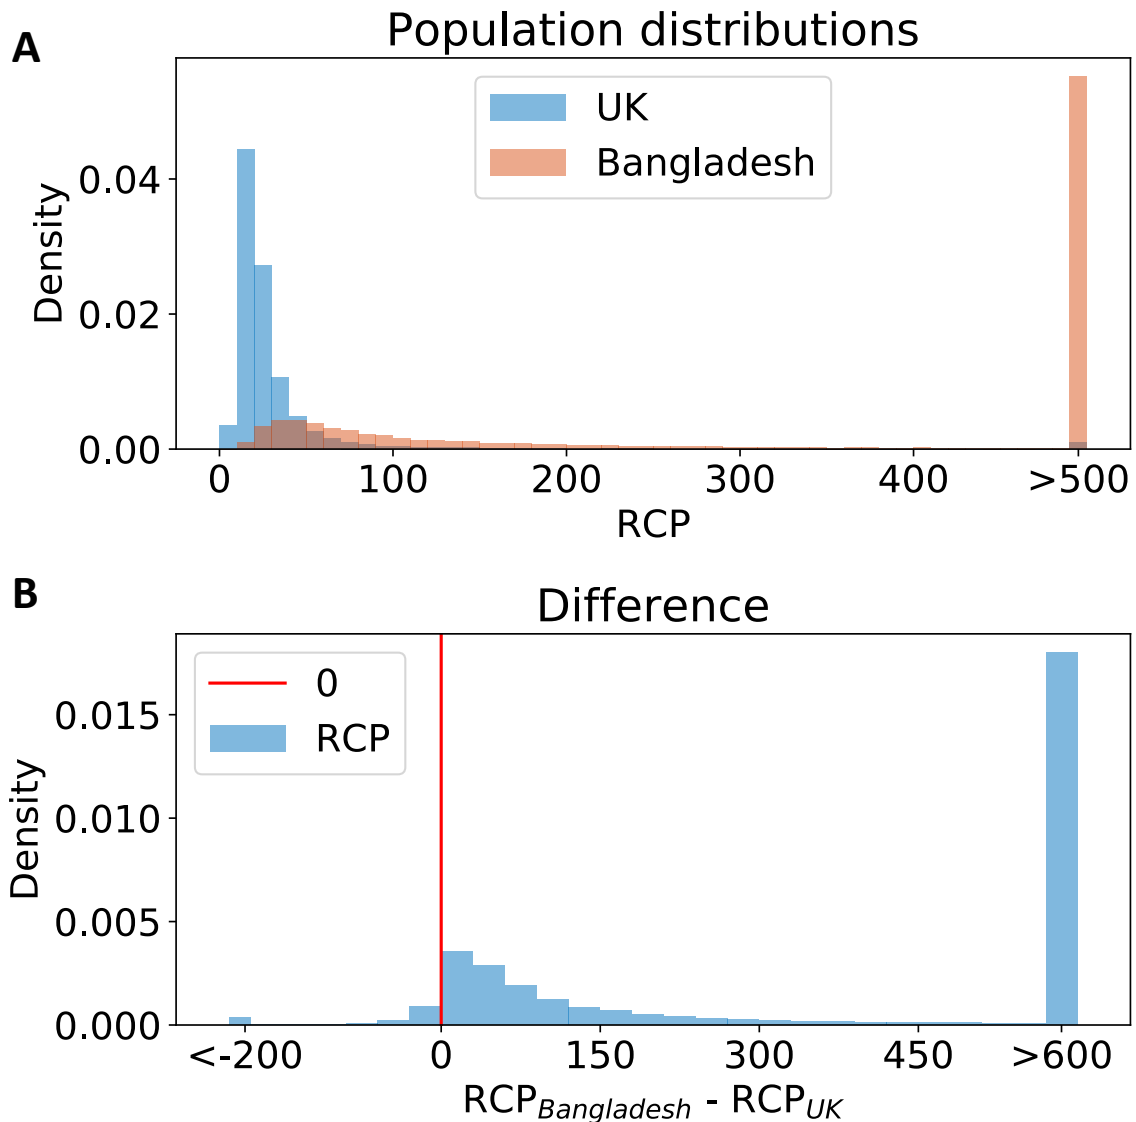

137

138 **Fig. 2 Inferences of DNA methylation stability differ between UK and Bangladeshi**  
139 **samples at the epigenetic-clock associated *LHCGR/LHR* locus.**

140 **A)** Ratio of Concordance Preference (RCP) is a metric that infers stability/flexibility of  
141 methylation states at matching CpG sites (CpG dyads) on the parent and daughter strand of  
142 individual DNA molecules, without assuming any specific enzymatic mechanisms of DNA  
143 methylation. Flexibility, indicated by RCP values near 1, indicates that the methylation  
144 system has no preference for either concordance or discordance of the methylation state at

145 a CpG dyad and follows the random model. High RCP values - with the extreme  
146 approaching infinity - indicate high stability, where epigenetic maintenance systems have  
147 complete preference for concordant methylation states of CpG dyads (they are either  
148 methylated or unmethylated); none, or very few CpG dyads are hemi-methylated. Shown are  
149 the RCP distributions taken from bootstrap samples, weighing each individual evenly within  
150 each group (UK = blue, Bangladesh = orange). The sampled population of double-stranded  
151 DNA molecules – and the corresponding methylation states of CpG dyads - revealed a clear  
152 preference for a more stable epigenetic maintenance system in operation at the *LHR* locus  
153 in women with a childhood in Bangladesh, when compared to inferred RCP values for the  
154 samples from women with a childhood in London. **B)** Testing if the bootstrap samples of  
155 RCP differences (Bangladesh vs UK childhood) are significantly different. The red line is set  
156 at 0. The p-value is derived from this as the proportion of samples to the left of 0 (a one-  
157 tailed test to examine whether Bangladesh RCPs are significantly greater than UK RCP  
158 values). Two-tailed p-value is the double of that amount.  $p = 0.026$  (one tailed);  $p = 0.052$  (two  
159 tailed)

160

161

## 162 **Conclusions**

163 The results of our study support a large body of work demonstrating phenotypic plasticity in  
164 response to environments encountered during early life. A childhood in Bangladesh  
165 measurably accelerates epigenetic/biological ageing in women, when compared to women  
166 of same chronological age (18 -35 yrs) and ethnicity, who were born and brought up in  
167 London, UK. The multi tissue epigenetic clock is thought to register the workings of  
168 developmental and epigenetic maintenance systems linking these processes with the life  
169 course [20,22]. Our study is one of the first to test if differences in function of the epigenetic  
170 maintenance system can be linked with epigenetic age estimators. The findings indicate that  
171 subtle differences in the stability of epigenetic states are indeed associated with biological  
172 ageing and opens a new line of investigation.

173

## 174 **Methods**

### 175 **DNA methylation data and establishment of DNAm Age**

176 Genome-wide cytosine methylation levels were established using the Illumina  
177 HumanMethylationEPIC BeadChip Array following isolation of genomic DNA from buccal  
178 cells DNA (DNeasy Blood & Tissue Kit (Qiagen)). Multidimensional scaling (MDS) plots



179 indicated that no significant batch effects were skewing the MethylationEPIC BeadChip data  
180 sets. The data were processed with the Bioconductor/minfi package. CpG probes associated  
181 with known SNPs were removed, as were those with a detection probability of <0.01. Probes  
182 on both X and Y chromosomes were retained. Methylation beta values (0-1) were  
183 normalized by SWAN. The methylation data set (GSE133355 study) is accessible on the  
184 Gene Expression Omnibus (GEO) data platform at:  
185 <https://www.ncbi.nlm.nih.gov/geo/query/acc.cgi?acc=GSE133355>

## 186 **Determination of DNAm Age and age acceleration**

187 A file with the beta values obtained from the Illumina HumanMethylationEPIC BeadChip  
188 Array work (see above) was used to establish the epigenetic age (DNAm age and  
189 AgeAccelerationResiduals) with Horvath's method [22]. The underlying algorithms are  
190 available through the online DNA methylation calculator (<http://dnamage.genetics.ucla.edu/>).

191

## 192 **Generation of bisulfite hairpin data / methylation states of CpG dyads at the** 193 ***LHGR/LHR* locus**

194 We have previously described in detail the concept and procedure of generating  
195 authenticated, non-redundant double-stranded DNA methylation data [19,29,30]. In brief,  
196 genomic sequence information surrounding the *LHR* clock-CpG site [one of the 353 CpG  
197 sites contributing to Horvath's clock [22]; Illumina cluster ID cg12351433 / chr2:48982957-  
198 48982957 / UCSC Genome Browser (GRCh37/hg19)] was used to identify suitable  
199 restriction recognition sites to generate 3', or 5'-overhangs, respectively, for the ligation of  
200 UMI-barcoded hairpin linkers. Specifically, restriction enzymes Styl or BstXI (New England  
201 Biolabs) were used. Combinations of the following primers were used to amplify hairpin-  
202 linked, bisulfite converted DNA:

203 bsLHR-R1 5'-RCAAATCAAACAAAACAAACTC-3';

204 bsLHR-R2 5'-CACTAAACACTATCRCAAATCAAAC-3';

205 bsLHR-F1 5'-TAGTAGGAAGGAGGTTATTGG-3';

206 bsLHR-F2 5'-GTAGGTTAAGGTAGAGTAGATTTAG-3';

207 bsLHR-F3 5'-GAATTGGGTTTTTGCGGTTTGTAG-3'.

208 Further information of the hairpin-concept and of the barcoded and batch-stamped hairpin  
209 linkers (Eurofins Genomics) are provided in Additional file 1.

210

211 **Processing of the sequencing data:** Fold is a web application for the analysis of the output  
212 of hairpin-bisulphite sequencing data. Specifically, the programme reconstructs, visualises,



213 and generates statistics on the double-stranded CpG methylation patterns of the original  
214 cohort of DNA molecules. This is achieved by first 'realigning' the top and bottom strand of  
215 the molecule about the hairpin, in which the programme attempts to manage 'PCR slippage',  
216 and other sequencing errors. Then algorithm then identifies and categorises CpG dyads,  
217 which is possible due to the previous bisulphite conversion of unmethylated cytosine to  
218 uracil (and so recognised as tyrosine when sequenced). For example, fully methylated  
219 dyads are those regions in where the reconstructed top strand is C-G and the bottom is G-C.  
220 Similarly, fully unmethylated dyads are those where the top is T-G and the bottom is G-T. In  
221 addition, the programme calculates a metric: 'Ratio of Concordance Principle' which  
222 quantifies the concordance of methylation between the top and bottom strands of the DNA  
223 molecule (0=complete discordance, 1=random concordance, inf=complete concordance).  
224 This metric represents the preference of the summation of epigenetic mechanisms of the cell  
225 to either maintain or obscure methylation patterns of the DNA in the cells at the time the  
226 sample was taken. The functions of Fold was written in R and the web application is written  
227 in PHP. The live web application can be found at <http://www.gregoryleeman.com/fold>, and  
228 the repository can be found at <https://github.com/gregoryleeman/fold>.

229

### 230 **Analysis and comparison of RCPs at the *LHCGR/LHR* locus**

231 RCP values are based on double-stranded DNA methylation data derived from sequences of  
232 individual hairpin bisulfite PCR products. RCP analyses were done following the  
233 procedures described in [28] with the small addition of bootstrapping individuals within each  
234 population. The additional step in the procedure helps to address the possibility of uneven  
235 sampling from a larger population. The analysis procedures in brief are described below.  
236 Each population RCP distribution was drawn through hierarchical bootstrap sampling. For  
237 each of 20,000 bootstrap samples, individuals in each population were sampled with  
238 replacement, and double stranded DNA sequences of each of the sampled individuals were  
239 in turn sampled with replacement. Dyad counts were then normalised such that each  
240 individual had the same number of dyads. The normalised dyad counts were then summed,  
241 corrected for failed bisulfite conversions (rate of 0.0039, measured empirically) and  
242 inappropriate conversions (rate of 0.017, estimated as described in [31] [Genereux et al.,  
243 2008]), and used to compute the RCP value. A bootstrap sample of the RCP difference was  
244 computed by taking the difference of the RCP values sampled for the two populations.

245

246 For one-tailed comparison tests, with which we examine directional differences, we  
247 determined the p-value as the proportion of bootstrap-difference samples to the left of 0. For

248 two-tailed tests, with which we can detect differences in any direction, we determined the p-  
249 value as twice the smaller proportion of the bootstrap difference samples on either side of 0.

250

### 251 **Availability of data and materials**

252 The datasets generated and/or analysed during the current study are available in the Gene  
253 Expression Omnibus (GEO) data platform

254 <https://www.ncbi.nlm.nih.gov/geo/query/acc.cgi?acc=GSE133355>

255 All data generated or analysed during this study are included in this published article and its  
256 supplementary information file.

257

### 258 **Competing interests**

259 The authors declare that they have no competing interests.

260

### 261 **Funding**

262 This research was supported by the Biotechnology and Biological Science Research Council  
263 (BBSRC) and the Economic and Social Research Council (ESRC) grant ES/N000471/1 (to  
264 GB, PM and RS).

265

### 266 **Authors' contributions**

267 RS: Conceptualisation, Funding acquisition, Experimental work, Analysis, Resources,  
268 Supervision, Data curation, Project administration, Writing – original draft, Writing – review &  
269 editing.

270 MC: Analysis, review & editing

271 GL: Analysis, Coding

272 RDE: Analysis, Data curation

273 KB: Experimental work, Resources

274 PM: Funding acquisition, Project administration, Writing - review & editing.

275 GRB: Conceptualisation, Funding acquisition, Project administration, Writing - review &  
276 editing.

277

### 278 **Acknowledgements**

279 We thank Kamila Derecka for technical support, Ian C. W. Hardy for statistical advice and  
280 Steve Horvath for information on DNAm age analysis.

281

282

## 283 **References**

- 284 1. Day FR, Ruth KS, Thompson DJ, Lunetta KL, Pervjakova N, Chasman DI, et al. Large-  
285 scale genomic analyses link reproductive aging to hypothalamic signaling, breast cancer  
286 susceptibility and BRCA1-mediated DNA repair. *Nat Genet.* Nature Publishing Group;  
287 2015;47:1294–303.
- 288 2. Zeng J, De Vlaming R, Wu Y, Robinson MR, Lloyd-Jones LR, Yengo L, et al. Signatures  
289 of negative selection in the genetic architecture of human complex traits. *Nat Genet.* Nature  
290 Publishing Group; 2018;50:746–53.
- 291 3. Fernández-Rhodes L, Malinowski JR, Wang Y, Tao R, Pankratz N, Jeff JM, et al. The  
292 genetic underpinnings of variation in ages at menarche and natural menopause among  
293 women from the multi-ethnic Population Architecture using Genomics and Epidemiology  
294 (PAGE) Study: A trans-ethnic meta-analysis. Thameem F, editor. *PLoS One.* Public Library  
295 of Science; 2018;13:e0200486.
- 296 4. Horikoshi M, Day FR, Akiyama M, Hirata M, Kamatani Y, Matsuda K, et al. Elucidating the  
297 genetic architecture of reproductive ageing in the Japanese population. *Nat Commun.*  
298 Nature Publishing Group; 2018;9:1–9.
- 299 5. Carty CL, Spencer KL, Setiawan VW, Fernandez-Rhodes L, Malinowski J, Buyske S, et  
300 al. Replication of genetic loci for ages at menarche and menopause in the multi-ethnic  
301 Population Architecture using Genomics and Epidemiology (PAGE) study. *Hum Reprod.*  
302 Oxford University Press; 2013;28:1695–706.
- 303 6. Parent AS, Teilmann G, Juul A, Skakkebaek NE, Toppari J, Bourguignon JP. The Timing  
304 of Normal Puberty and the Age Limits of Sexual Precocity: Variations around the World,  
305 Secular Trends, and Changes after Migration. *Endocr. Rev.* *Endocr Rev*; 2003. p. 668–93.
- 306 7. Bar-Sadeh B, Rudnizky S, Pnueli L, Bentley GR, Stöger R, Kaplan A, et al. Unravelling  
307 the role of epigenetics in reproductive adaptations to early-life environment. *Nat. Rev.*  
308 *Endocrinol.* Nature Research; 2020. p. 519–33.
- 309 8. Magid KS, Uddin Ahamed F, Lawson DW, Chatterton RT, Bentley GR. Effects of adult  
310 migration on male salivary testosterone. *Am J Hum Biol.* 2006;18:262.
- 311 9. Begum K, Muttukrishna S, Sievert L, Sharmeen T, Murphy L, Chowdhury O, et al.  
312 Ethnicity or environment: Effects of migration on ovarian reserve among Bangladeshi  
313 women in the UK. *Fertil Steril.* 2015;under revi.
- 314 10. Nunez-De La Mora A, Bentley GR, Choudhury OA, Napolitano DA, Chatterton RT. The  
315 impact of developmental conditions on adult salivary estradiol levels: why this differs from  
316 progesterone? *Am J Hum Biol.* 2007/10/25. 2008;20:2–14.
- 317 11. Houghton LC, Cooper GD, Booth M, Chowdhury OA, Troisi R, Ziegler RG, et al.

- 318 Childhood environment influences adrenarcheal timing among first-generation Bangladeshi  
319 migrant girls to the UK. Sear R, editor. PLoS One. 2014/10/14. 2014;9:e109200.
- 320 12. Perry JRB, Murray A, Day FR, Ong KK. Molecular insights into the aetiology of female  
321 reproductive ageing. Nat. Rev. Endocrinol. Nature Publishing Group; 2015. p. 725–34.
- 322 13. Núñez-de la Mora A, Chatterton RT, Choudhury OA, Napolitano DA, Bentley GR,  
323 Nunez-de la Mora A, et al. Childhood conditions influence adult progesterone levels. Fisk  
324 NM, editor. PLoS Med. 2007/05/17. 2007;4:e167.
- 325 14. Siddique AK, Baqui AH, Eusof A, Zaman K. 1988 floods in Bangladesh: pattern of illness  
326 and causes of death. J Diarrhoeal Dis Res. 1991;9:310–4.
- 327 15. Murphy L, Sievert L, Begum K, Sharmeen T, Puleo E, Chowdhury O, et al. Life course  
328 effects on age at menopause among Bangladeshi sedentees and migrants to the UK. Am J  
329 Hum Biol. 2012/11/24. 2013;25:83–93.
- 330 16. Bar-Sadeh B, Pnueli L, Begum K, Leeman G, Emes RD, Stöger R, et al. Early-life  
331 environment programs reproductive strategies through epigenetic regulation of SRD5A1 1.  
332 bioRxiv. Cold Spring Harbor Laboratory; 2020;2020.09.16.299560.
- 333 17. Zhu J, Adli M, Zou JY, Verstappen G, Coyne M, Zhang X, et al. Genome-wide Chromatin  
334 State Transitions Associated with Developmental and Environmental Cues. Cell.  
335 2013;152:642–54.
- 336 18. Jaenisch R, Bird A. Epigenetic regulation of gene expression: how the genome  
337 integrates intrinsic and environmental signals. Nat Genet. 2003;33 Suppl:245–54.
- 338 19. Laird CD, Pleasant ND, Clark AD, Sneed JL, Hassan KMA, Manley NC, et al. Hairpin-  
339 bisulfite PCR: Assessing epigenetic methylation patterns on complementary strands of  
340 individual DNA molecules. Proc Natl Acad Sci U S A. National Academy of Sciences;  
341 2004;101:204–9.
- 342 20. Horvath S, Raj K. DNA methylation-based biomarkers and the epigenetic clock theory of  
343 ageing. Nat Rev Genet. Nature Publishing Group; 2018;19:371–84.
- 344 21. Khan SS, Singer BD, Vaughan DE. Molecular and physiological manifestations and  
345 measurement of aging in humans. Aging Cell. Blackwell Publishing Ltd; 2017;16:624–33.
- 346 22. Horvath S. DNA methylation age of human tissues and cell types. Genome Biol.  
347 2013/10/22. BioMed Central Ltd; 2013;14:R115.
- 348 23. Dhingra R, Nwanaji-Enwerem JC, Samet M, Ward-Caviness CK. DNA Methylation  
349 Age—Environmental Influences, Health Impacts, and Its Role in Environmental  
350 Epidemiology. Curr. Environ. Heal. reports. Springer; 2018. p. 317–27.
- 351 24. Quach A, Levine ME, Tanaka T, Lu AT, Chen BH, Ferrucci L, et al. Epigenetic clock  
352 analysis of diet, exercise, education, and lifestyle factors. Aging (Albany NY). 2017;9:419–

- 353 46.
- 354 25. Austin MK, Chen E, Ross KM, McEwen LM, Maclsaac JL, Kobor MS, et al. Early-life  
355 socioeconomic disadvantage, not current, predicts accelerated epigenetic aging of  
356 monocytes. *Psychoneuroendocrinology*. 2018;97:131–4.
- 357 26. Levine ME, Lu AT, Quach A, Chen BH, Assimes TL, Bandinelli S, et al. An epigenetic  
358 biomarker of aging for lifespan and healthspan. *Aging (Albany NY)*. 2018;10:573–91.
- 359 27. Editorial. Molecular test of age highlights difficult questions. 2018;561.
- 360 28. Choi M, Genereux DP, Goodson J, Al-Azzawi H, Allain SQ, Simon N, et al. Epigenetic  
361 memory via concordant DNA methylation is inversely correlated to developmental potential  
362 of mammalian cells. Barsh GS, editor. *PLOS Genet*. 2017;13:e1007060.
- 363 29. Miner BE, Stöger RJ, Burden AF, Laird CD, Hansen RS. Molecular barcodes detect  
364 redundancy and contamination in hairpin-bisulfite PCR. *Nucleic Acids Res*. 2004;32.
- 365 30. Stöger R. Hairpin-Bisulfite PCR. *Methods Mol Biol. NLM (Medline)*; 2021;2198:287–99.
- 366 31. Genereux DP, Johnson WC, Burden AF, Stöger R, Laird CD. Errors in the bisulfite  
367 conversion of DNA: modulating inappropriate- and failed-conversion frequencies. *Nucleic  
368 Acids Res*. 2008/11/06. Oxford University Press; 2008;36:e150.
- 369
- 370

371  
372  
373  
374  
375  
376  
377  
378  
379  
380  
381  
382

## Additional file 1: Chronological age vs DNAm Age

### Estimates of DNA methylation age (DNAm Age)

The online calculator ( <https://dnamage.genetics.ucla.edu/> ) was used to generate estimates of DNAm Age, AgeAccelerationDiff (= DNAmAge-Age), and AgeAccelerationResidual (= the recommended age acceleration measure based on Horvath's linear regression model [Horvath S (2013) DNA methylation age of human tissues and cell types. *Genome Biol* 14(10):R115 PMID: 24138928]).

| id | Sample ID            | Childhood location | Age at time of sample collection | DNAmAge | AgeAcceleration Diff | AgeAcceleration Residual |
|----|----------------------|--------------------|----------------------------------|---------|----------------------|--------------------------|
| 1  | X201247480032_R01C01 | uk                 | 22                               | 30.4    | 8.4                  | 7.2                      |
| 5  | X201247480032_R04C01 | uk                 | 25                               | 29.0    | 4.0                  | 2.4                      |
| 8  | X201247480032_R07C01 | uk                 | 27                               | 27.9    | 0.9                  | -1.1                     |
| 14 | X201247480031_R03C01 | uk                 | 31                               | 30.9    | -0.1                 | -2.6                     |
| 15 | X201247480031_R04C01 | uk                 | 33                               | 29.1    | -3.9                 | -6.6                     |
| 22 | X201247480036_R03C01 | uk                 | 35                               | 29.3    | -5.7                 | -8.7                     |
| 23 | X201247480036_R04C01 | uk                 | 26                               | 24.8    | -1.2                 | -3.0                     |
| 24 | X201247480036_R05C01 | uk                 | 27                               | 20.4    | -6.6                 | -8.6                     |
| 25 | X201247480036_R06C01 | uk                 | 25                               | 15.0    | -10.0                | -11.6                    |
| 30 | X201247480034_R03C01 | uk                 | 21                               | 22.2    | 1.2                  | 0.1                      |
| 31 | X201247480034_R04C01 | uk                 | 26                               | 22.7    | -3.3                 | -5.1                     |
| 2  | X201247480032_R02C01 | bangladesh         | 34                               | 37.4    | 3.4                  | 0.5                      |
| 4  | X201247480032_R03C01 | bangladesh         | 32                               | 50.6    | 18.6                 | 16.0                     |
| 12 | X201247480031_R01C01 | bangladesh         | 35                               | 41.3    | 6.3                  | 3.2                      |
| 13 | X201247480031_R02C01 | bangladesh         | 21                               | 27.0    | 6.0                  | 4.9                      |
| 16 | X201247480031_R05C01 | bangladesh         | 33                               | 44.2    | 11.2                 | 8.4                      |
| 17 | X201247480031_R06C01 | bangladesh         | 28                               | 41.5    | 13.5                 | 11.4                     |
| 18 | X201247480031_R07C01 | bangladesh         | 35                               | 31.2    | -3.8                 | -6.9                     |
| 19 | X201247480031_R08C01 | bangladesh         | 29                               | 25.6    | -3.4                 | -5.6                     |
| 20 | X201247480036_R01C01 | bangladesh         | 32                               | 35.9    | 3.9                  | 1.3                      |
| 21 | X201247480036_R02C01 | bangladesh         | 28                               | 24.8    | -3.2                 | -5.3                     |
| 26 | X201247480036_R07C01 | bangladesh         | 32                               | 37.9    | 5.9                  | 3.3                      |
| 27 | X201247480036_R08C01 | bangladesh         | 35                               | 38.1    | 3.1                  | 0.0                      |
| 28 | X201247480034_R01C01 | bangladesh         | 34                               | 40.8    | 6.8                  | 3.8                      |
| 32 | X201247480034_R05C01 | bangladesh         | 28                               | 32.5    | 4.5                  | 2.4                      |
| 36 | X201247480034_R07C01 | bangladesh         | 22                               | 25.2    | 3.2                  | 1.9                      |

383  
384  
385  
386  
387  
388

389 **Prism GraphPad 8 analysis / Chronological age vs DNAm Age:**

390 The slopes of the regression lines between the 'UK' group (n=11) and the 'Bangladesh' group (n=15)  
 391 are not significantly different ( $F = 1.136$ ;  $DFn = 1$ ,  $DFd = 22$   $p=0.29$ ). Therefore, a single slope for data  
 392 of the entire cohort can be established: the pooled slope equals 0.8128 (Additional Fig 1a). However,  
 393 the intercepts are significantly different ( $F = 8.341$ .  $DFn = 1$ ,  $DFd = 23$ ,  $p=0.0083$ )  
 394

Additional Fig 1a

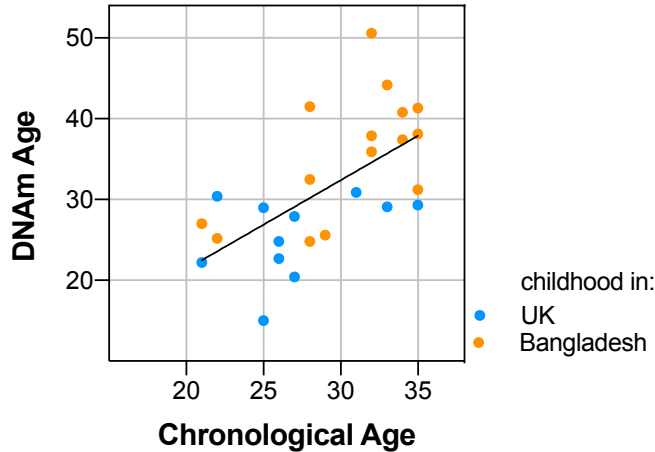

395 **Additional Fig 1a:** Plot of predicted methylation age (Horvath clock) against chronological age.  
 396

397 The scatter plot shows DNA methylation age vs. chronological age vs. and the line in which DNA  
 398 methylation age was regressed on chronological age using both, the 'UK' and the 'Bangladesh' data  
 399 sets. 'UK' = Bangladeshi women who grew up in London, UK (blue); 'Bangladesh' = Bangladeshi  
 400 women who grew up in Sylhet, Bangladesh. Each data point represents an individual, with the colour  
 401 indicating the corresponding dataset.  
 402

403 **Genstat analysis / Chronological age vs DNAm Age:**

404 Genstat analysis of covariance yielded similar results to those obtained by Prism GraphPad 8  
 405 analysis, in that Bangladeshi women with a childhood in the UK and Bangladeshi women with a  
 406 childhood in Bangladesh are affected by chronological age the same way - the two slopes are the  
 407 same based on a minimal adequate mode (Additional Fig 1b). Parameters needed to reconstruct the  
 408 lines are indicated in yellow:

409 **Estimates of parameters**

| Parameter         | estimate | s.e.  | t(23) | t pr. |
|-------------------|----------|-------|-------|-------|
| Constant          | 10.78    | 8.35  | 1.29  | 0.209 |
| Country UK        | -7.19    | 2.49  | -2.89 | 0.008 |
| chronological_age | 0.813    | 0.269 | 3.02  | 0.00  |

415 Parameters for factors are differences compared with the reference level:

| Factor  | Reference level |
|---------|-----------------|
| Country | Bangladesh      |

419 **Accumulated analysis of variance**

| Change                      | d.f. | s.s.    | m.s.   | v.r.  | F pr.                                                                  |
|-----------------------------|------|---------|--------|-------|------------------------------------------------------------------------|
| + chronological_age         | 1    | 660.09  | 660.09 | 19.57 | <.001                                                                  |
| + Country                   | 1    | 282.95  | 282.95 | 8.39  | 0.008                                                                  |
| + chronological_age.Country | 1    | 38.32   | 38.32  | 1.14  | 0.298                                                                  |
| Residual                    | 22   | 741.94  | 33.72  |       |                                                                        |
| - chronological_age.Country | -1   | -38.32  | 38.32  | 1.14  | 0.298 interaction not significant                                      |
| - Country                   | -1   | -282.95 | 282.95 | 8.39  | 0.008 country significant                                              |
| + Country                   | 1    | 282.95  | 282.95 | 8.39  | 0.008 country put back into model                                      |
| - chronological_age         | -1   | -309.57 | 309.57 | 9.18  | 0.006 age significant                                                  |
| + chronological_age         | 1    | 309.57  | 309.57 | 9.18  | 0.006 age put back into model, so that the final model can be plotted. |
| Total                       | 25   | 1723.29 | 68.93  |       |                                                                        |

432



433 Additional Fig 1b: The minimal adequate model (Genstat analysis):  
 434

Additional Fig 1 b

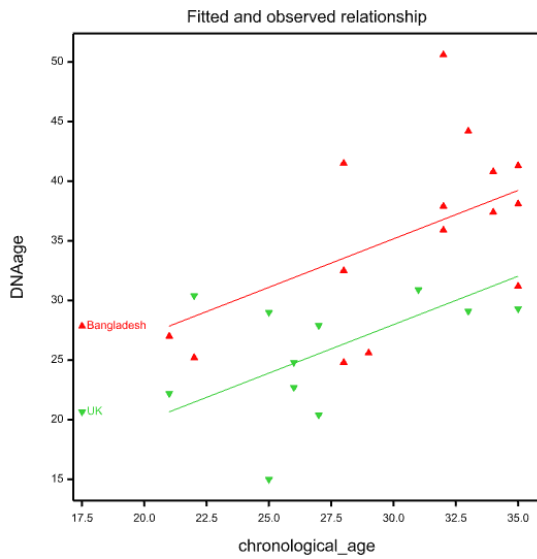

435  
 436  
 437  
 438  
 439  
 440  
 441  
 442

**DNA sequence surrounding the LHR-clock CpG site analysed by hairpin bisulfite PCR**

The CpG site [clock CpG] at the *Luteinizing Hormone/Choriogonadotropin Receptor (LHCGR/LHR)* locus, which contributes to 'Horvath's clock' (Horvath, 2013) was PCR-amplified following hairpin linker-ligation and sodium bisulfite conversion. The hairpin PCR products also captured methylation information of flanking CpGs (highlighted in red): four CpGs with the **Styl**-hairpin linker approach and eight CpGs with the **BstXI**-hairpin linker approach, respectively:

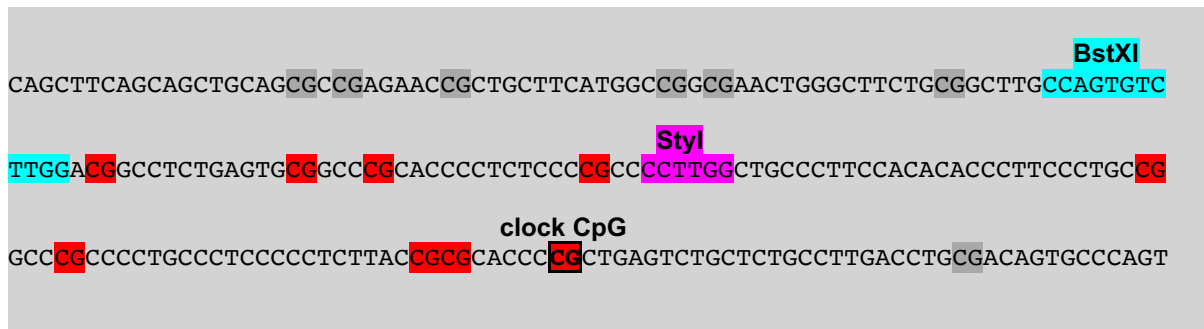

443  
 444  
 445  
 446

447 **BstXI- and Styl-hairpin linkers used in this study**

448

| Name:       | Sequence:                   | individual | converted                  |
|-------------|-----------------------------|------------|----------------------------|
| hLHR-hp-III | ACAGTGCADDDDDDDTGCACGTgtc   | #12        | ATAGTGTADDDDDDDTGTATTgtt   |
| hLHR-hp-1   | ACATGGCADDDDDDTGCACGTgtc    | #16        | ATATGGTADDDDDDDTGTATTgtt   |
| hLHR-hp-2   | ATCGTGCADDDDDDDTGCACGAtgtc  | #17        | ATTGTGTADDDDDDDTGTATGAtgtt |
| hLHR-hp-3   | AAGGTGCADDDDDDDTGCACCTTgtc  | #19        | AAGGTGTADDDDDDDTGTATTTgtt  |
| hLHR-hp-4   | AACCTGCADDDDDDDTGCAGGTTgtc  | #22        | AATTTGTADDDDDDDTGTAGGTTgtt |
| hLHR-hp-5   | TAGCACGTDDDDDDACGTGCTAtgtc  | #13        | TAGTATGTDDDDDDATGTGTTAtgtt |
| hLHR-hp-6   | TTACACGTDDDDDDACGTGTAAtgtc  | #15        | TTATATGTDDDDDDATGTGTAAtgtt |
| hLHR-hp-7   | TTCACGTDDDDDDACGTGGAAtgtc   | #23        | TTTATGTDDDDDDATGTGGAAtgtt  |
| hLHR-hp-8   | TTTCACGTDDDDDDACGTGAAAtgtc  | #29        | TTTATGTDDDDDDATGTGAAAtgtt  |
| hLHR-hp-9   | TTGAACGTDDDDDDACGTTCAAAtgtc | #30        | TTGAATGTDDDDDDATGTAAAtgtt  |
| hLHR-hp-10  | TTGTACGTDDDDDDACGTACAAAtgtc | #31        | TTGTATGTDDDDDDATGTATAAtgtt |
| <b>Styl</b> |                             |            |                            |
| hLHR-hp-11  | caagACATGGCADDDDDDTGCCATGT  | #5/6       | taagATATGGTADDDDDDTGTTATGT |
| hLHR-hp-12  | caagATCGTGCADDDDDDTGCCACGAT | #7         | taagATTGTGTADDDDDDTGTATGAT |
| hLHR-hp-13  | caagAAGGTGCADDDDDDTGCCACCTT | #8         | taagAAGGTGTADDDDDDTGTATTTT |
| hLHR-hp-14  | caagAACCTGCADDDDDDTGCCAGGTT | #10        | taagAATTTGTADDDDDDTGTAGGTT |
| hLHR-hp-15  | caagTAGCACGTDDDDDDACGTGCTA  | #25        | taagTAGTATGTDDDDDDATGTGTTA |
| hLHR-hp-16  | caagTTACACGTDDDDDDACGTGTA   | #16        | taagTTATATGTDDDDDDATGTGTAA |
| hLHR-hp-17  | caagTTCCACGTDDDDDDACGTGGAA  | #17        | taagTTTATGTDDDDDDATGTGGAA  |
| hLHR-hp-18  | caagTTTCACGTDDDDDDACGTGAAA  | #18 / #27  | taagTTTATGTDDDDDDATGTGAAA  |
| hLHR-hp-19  | caagTTGAACGTDDDDDDACGTTCAA  | #20 / #28  | taagTTGAATGTDDDDDDATGTTTAA |
| hLHR-hp-20  | caagTTGTACGTDDDDDDACGTACAA  | #36 / #32  | taagTTGTATGTDDDDDDATGTATAA |

449

450

451

452

**Double-stranded methylation data of individual DNA molecules derived from buccal cells**

The data shown on page 5 are processed, in that the methylation status of matching CpG sites of the top- and bottom strands (CpG dyads) are indicated as methylated (=1), or unmethylated (=0).

Information of individual, double-stranded DNA molecules is displayed as follows:

453

454

455

456

457

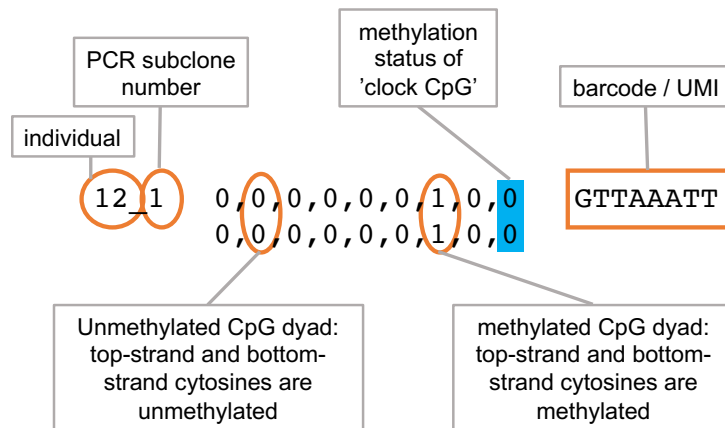

458

459

460

461

## 462 Hairpin methylation data / Bangladesh-childhood

|     |       |                   |          |
|-----|-------|-------------------|----------|
| 463 |       |                   |          |
| 464 | 12_1  | 0,0,0,0,0,0,1,0,0 | GTTAAATT |
| 465 |       | 0,0,0,0,0,0,1,0,0 |          |
| 466 | 12_2  | 0,0,0,0,0,0,0,0,1 | GTATTATT |
| 467 |       | 0,0,0,0,0,0,0,0,1 |          |
| 468 | 12_3  | 0,0,0,0,0,0,0,0,1 | TGGTTTAA |
| 469 |       | 0,0,0,0,0,0,0,0,1 |          |
| 470 | 12_4  | 0,0,0,0,0,0,0,0,0 | GGTTGAGG |
| 471 |       | 0,0,0,0,0,0,0,0,0 |          |
| 472 | 12_5  | 0,0,0,0,0,0,0,0,0 | ATTTGTTG |
| 473 |       | 0,0,0,0,0,0,0,0,0 |          |
| 474 | 12_6  | 0,0,0,0,0,0,0,0,0 | TAGGAGTG |
| 475 |       | 0,0,0,0,0,0,0,0,0 |          |
| 476 | 12_7  | 0,0,0,1,0,0,0,0,0 | GGTTTGAA |
| 477 |       | 0,0,0,0,0,0,0,0,0 |          |
| 478 | 12_8  | 0,0,0,0,0,0,0,0,0 | GGTGTGTT |
| 479 |       | 0,0,0,0,0,0,0,0,0 |          |
| 480 | 12_9  | 0,0,0,0,0,0,1,0,0 | AGATGTAA |
| 481 |       | 0,0,0,0,0,0,1,0,0 |          |
| 482 | 12_10 | 0,0,0,1,0,0,0,0,0 | TTGGAGGG |
| 483 |       | 0,0,0,1,0,0,0,0,0 |          |
| 484 | 12_11 | 0,0,0,0,0,0,0,0,0 | ATTTAGTT |
| 485 |       | 0,0,0,0,0,0,0,0,0 |          |
| 486 | 12_12 | 0,0,0,0,0,0,0,0,0 | TGTAAAGA |
| 487 |       | 0,0,0,0,0,0,0,0,0 |          |
| 488 | 12_13 | 0,0,1,1,0,0,0,0,0 | TGTTTTTT |
| 489 |       | 0,1,1,1,1,0,0,0,0 |          |
| 490 | 12_14 | 0,0,0,0,0,0,0,0,0 | ATTTTAGG |
| 491 |       | 0,0,0,0,0,0,0,1,0 |          |
| 492 | 12_15 | 0,0,0,0,0,0,0,0,0 | TTGGATTT |
| 493 |       | 0,0,0,0,0,0,0,0,0 |          |
| 494 | 12_16 | 0,0,0,0,0,0,0,0,0 | TTGAAAGG |
| 495 |       | 0,0,0,0,0,0,0,0,0 |          |
| 496 | 12_17 | 0,0,0,0,0,0,0,0,0 | GGGTTAAG |
| 497 |       | 0,0,0,0,0,0,0,0,0 |          |
| 498 | 13_1  | 0,0,0,0,1,1,0,0,0 | AAGAGAGT |
| 499 |       | 0,0,0,0,0,0,0,0,0 |          |
| 500 | 13_2  | 0,0,0,0,0,0,0,0,0 | TTGTTATA |
| 501 |       | 0,0,0,0,0,0,0,0,0 |          |
| 502 | 13_3  | 0,0,0,0,0,0,0,0,0 | TAAATGTA |
| 503 |       | 0,0,0,0,0,0,0,0,0 |          |
| 504 | 13_4  | 0,0,0,1,0,0,0,0,1 | TTAGATGG |
| 505 |       | 0,0,0,1,0,0,0,0,1 |          |
| 506 | 13_5  | 0,0,0,0,0,0,0,0,0 | TGATATAA |
| 507 |       | 0,0,0,0,0,0,0,0,0 |          |
| 508 | 13_6  | 0,0,0,0,0,0,0,1,0 | GGGTTGGG |
| 509 |       | 0,0,0,0,0,0,0,0,0 |          |
| 510 | 13_7  | 0,0,0,0,0,0,0,0,0 | GATTGATA |
| 511 |       | 0,0,0,0,0,0,0,0,0 |          |
| 512 | 13_8  | 0,0,0,0,0,0,0,0,0 | GGGTTAAG |
| 513 |       | 0,0,0,0,0,0,0,0,0 |          |
| 514 | 13_9  | 0,0,0,0,0,0,0,0,0 | TAGTATAT |
| 515 |       | 0,0,0,0,0,0,0,0,0 |          |
| 516 | 13_10 | 0,0,0,0,0,0,0,0,0 | AAAAATAA |
| 517 |       | 0,0,0,0,0,0,0,0,0 |          |
| 518 | 13_11 | 0,0,0,0,0,0,0,0,0 | ATAGGAAG |
| 519 |       | 0,0,0,0,0,0,0,0,0 |          |
| 520 | 13_12 | 0,0,0,0,0,0,0,0,1 | TGGGATGA |
| 521 |       | 0,0,0,0,0,0,0,0,1 |          |
| 522 | 13_13 | 0,0,0,0,0,0,0,0,0 | TATGTTTG |
| 523 |       | 0,0,0,0,0,0,0,0,0 |          |
| 524 | 13_14 | 0,0,0,0,1,1,0,0,0 | GAGAAATG |
| 525 |       | 0,0,0,0,1,1,0,0,0 |          |
| 526 | 13_15 | 0,1,0,0,0,0,0,0,0 | TTTATTGT |
| 527 |       | 0,1,0,0,0,0,0,0,0 |          |
| 528 | 13_16 | 0,0,0,0,0,0,0,0,0 | TTTGTAGA |
| 529 |       | 0,0,0,0,0,0,0,0,0 |          |
| 530 | 13_17 | 0,0,0,0,0,0,0,0,0 | ATGTTAGT |
| 531 |       | 0,0,0,0,0,0,0,0,0 |          |
| 532 | 13_18 | 0,0,0,0,0,0,0,0,0 | ATGAGGGG |
| 533 |       | 0,0,0,0,0,0,0,0,0 |          |
| 534 | 13_19 | 0,0,0,0,0,0,1,0,0 | GTTTGAAG |
| 535 |       | 0,0,0,0,0,0,0,0,0 |          |
| 536 | 19_1  | 0,0,0,0,0,0,0,0,0 | GTGAATAT |
| 537 |       | 0,1,0,0,0,0,0,0,0 |          |
| 538 | 19_2  | 0,0,0,0,0,0,0,0,0 | TAGGGAAT |
| 539 |       | 0,0,0,0,0,0,0,0,0 |          |

|     |       |                   |          |
|-----|-------|-------------------|----------|
| 540 | 19_3  | 0,0,0,0,0,0,1,1,1 | GTGGGGTG |
| 541 |       | 0,0,0,0,0,0,1,1,1 |          |
| 542 | 19_4  | 0,0,0,0,0,0,0,0,0 | GAAATAGT |
| 543 |       | 0,0,0,0,0,0,0,0,0 |          |
| 544 | 19_5  | 0,0,0,0,0,0,1,0,1 | GTGTGTAT |
| 545 |       | 0,0,0,0,0,0,1,0,1 |          |
| 546 | 19_6  | 0,0,0,0,0,0,0,0,0 | TGATGTGA |
| 547 |       | 0,0,0,0,0,0,0,0,0 |          |
| 548 | 19_7  | 0,0,0,0,0,0,0,0,0 | ATAGTAAT |
| 549 |       | 0,0,0,0,0,0,0,0,0 |          |
| 550 | 19_8  | 0,0,0,0,0,0,0,0,0 | ATATGTTC |
| 551 |       | 0,0,0,0,0,0,0,0,0 |          |
| 552 | 19_9  | 1,1,0,0,0,0,0,0,0 | AGTTGAGG |
| 553 |       | 1,1,0,0,0,0,0,0,0 |          |
| 554 | 19_10 | 0,0,0,0,0,0,0,0,0 | TTTAAAAA |
| 555 |       | 0,0,0,0,0,0,0,0,0 |          |
| 556 | 19_11 | 0,0,0,0,0,0,0,0,0 | GATAATTT |
| 557 |       | 0,0,0,0,0,0,0,0,0 |          |
| 558 | 19_12 | 0,0,0,0,0,0,0,0,0 | GTTGTGTG |
| 559 |       | 0,0,0,0,0,0,0,0,0 |          |
| 560 | 19_13 | 0,0,0,0,0,0,0,0,0 | TTGTGTAT |
| 561 |       | 0,0,0,0,0,0,0,0,0 |          |
| 562 | 19_14 | 0,1,1,0,0,0,0,0,0 | TTGGGTAT |
| 563 |       | 0,1,1,0,0,0,0,0,0 |          |
| 564 | 19_15 | 0,0,0,0,0,0,1,0,0 | ATTTATTT |
| 565 |       | 0,0,0,0,0,0,1,0,0 |          |
| 566 | 19_16 | 0,0,0,1,0,0,0,0,0 | GTGGAGGT |
| 567 |       | 0,0,0,1,0,0,0,0,0 |          |
| 568 | 19_17 | 0,0,0,0,0,0,0,0,1 | TAAGTAGG |
| 569 |       | 0,0,0,0,0,0,0,0,1 |          |
| 570 | 19_18 | 0,0,0,0,0,1,0,0,0 | AATGTTGT |
| 571 |       | 0,0,0,0,0,1,0,0,0 |          |
| 572 | 19_19 | 0,0,0,0,0,0,0,0,0 | TTAAGGGT |
| 573 |       | 0,0,0,0,0,0,0,0,0 |          |
| 574 | 19_20 | 0,0,0,0,0,0,0,0,0 | TTAAAGGT |
| 575 |       | 0,0,0,0,0,0,0,0,0 |          |
| 576 | 19_21 | 0,0,0,0,0,0,0,0,0 | TAGATTTG |
| 577 |       | 0,0,0,0,0,0,0,0,0 |          |
| 578 | 19_22 | 0,0,0,0,0,0,0,0,0 | GGGATTTT |
| 579 |       | 0,0,0,0,0,0,0,0,0 |          |
| 580 | 19_23 | 0,0,0,0,0,0,0,0,0 | AGATFGTG |
| 581 |       | 0,0,0,0,0,0,0,0,0 |          |
| 582 | 19_24 | 0,0,0,0,0,0,0,0,0 | TTAATAAT |
| 583 |       | 0,0,0,0,0,0,0,0,0 |          |
| 584 | 20_1  | 0,0,1,1,1         | AGAGATGG |
| 585 |       | 0,0,1,1,1         |          |
| 586 | 20_2  | 0,0,1,1,1         | GAAGGATA |
| 587 |       | 0,0,1,1,1         |          |
| 588 | 20_3  | 0,0,1,1,1         | TAGGTAGG |
| 589 |       | 0,0,1,1,1         |          |
| 590 | 20_4  | 0,0,0,0,0         | GGGGATGG |
| 591 |       | 0,0,0,0,0         |          |
| 592 | 20_5  | 0,0,0,0,0         | AAATGTGG |
| 593 |       | 0,0,0,0,0         |          |
| 594 | 20_6  | 0,0,0,0,0         | GTAGTTTA |
| 595 |       | 0,0,0,0,0         |          |
| 596 | 20_7  | 0,0,1,0,1         | ATAAAGAG |
| 597 |       | 0,0,1,0,1         |          |
| 598 | 20_8  | 1,1,1,0,1         | GTGAGGAG |
| 599 |       | 1,1,1,0,1         |          |
| 600 | 20_9  | 0,0,0,0,0         | GATGGGGT |
| 601 |       | 0,0,1,0,1         |          |
| 602 | 20_10 | 0,0,0,0,0         | TATGAGTG |
| 603 |       | 0,0,0,0,0         |          |
| 604 | 20_11 | 0,0,0,0,0         | AAAAATTG |
| 605 |       | 0,0,0,0,0         |          |
| 606 | 21_1  | 1,1,1,1,1         | ATGAGGAT |
| 607 |       | 1,1,1,1,1         |          |
| 608 | 21_2  | 1,1,1,1,1         | GGTGATTG |
| 609 |       | 1,1,1,1,1         |          |
| 610 | 21_3  | 1,1,1,1,1         | TGGGATAA |
| 611 |       | 1,1,1,1,1         |          |
| 612 | 21_4  | 1,1,1,1,1         | GGATGTGA |
| 613 |       | 1,1,1,1,1         |          |
| 614 | 21_5  | 1,1,1,1,1         | TAAGGGGG |
| 615 |       | 1,1,1,1,1         |          |
| 616 | 36_1  | 0,1,0,1,0         | GGAGAAGT |
| 617 |       | 0,1,0,1,0         |          |

|     |       |           |          |
|-----|-------|-----------|----------|
| 618 | 36_2  | 0,0,0,0,0 | AGGGAGTT |
| 619 |       | 0,0,0,0,0 |          |
| 620 | 36_3  | 0,0,0,0,0 | GGAGAGGA |
| 621 |       | 0,0,0,0,0 |          |
| 622 | 36_4  | 0,0,0,0,0 | GGAGAGGG |
| 623 |       | 0,0,0,0,0 |          |
| 624 | 36_5  | 0,0,0,0,0 | AGAGTAGT |
| 625 |       | 0,0,0,0,0 |          |
| 626 | 36_6  | 0,0,0,0,0 | AGGGAGGA |
| 627 |       | 0,0,0,0,0 |          |
| 628 | 36_7  | 0,0,0,0,0 | AAATTTAG |
| 629 |       | 0,0,0,0,0 |          |
| 630 | 36_8  | 0,0,0,0,0 | GGGTAATA |
| 631 |       | 0,0,0,0,0 |          |
| 632 | 36_9  | 0,0,0,0,0 | ATATGGAG |
| 633 |       | 0,0,0,0,0 |          |
| 634 | 36_10 | 0,0,0,0,0 | AAGAAAAA |
| 635 |       | 0,0,0,0,0 |          |
| 636 | 36_11 | 0,0,0,0,0 | ATAAGAAA |
| 637 |       | 0,0,0,0,0 |          |
| 638 | 36_12 | 0,0,0,0,1 | AAGGGGTA |
| 639 |       | 0,0,0,0,1 |          |
| 640 |       |           |          |

641

642

### 643 Hairpin methylation data / Bangladesh-childhood

|     |       |                     |          |
|-----|-------|---------------------|----------|
| 644 |       |                     |          |
| 645 | 5_1   | 0,0,0,0,0           | AGTTGTTT |
| 646 |       | 0,0,0,0,0           |          |
| 647 | 5_2   | 0,0,1,0,0           | GGATGATA |
| 648 |       | 0,0,1,0,0           |          |
| 649 | 5_3   | 1,1,1,1,1           | GATAGTTG |
| 650 |       | 1,1,1,1,1           |          |
| 651 | 5_4   | 1,1,1,1,1           | GTTTAGGT |
| 652 |       | 1,1,1,0,1           |          |
| 653 | 5_5   | 0,0,0,0,1           | TGGGGTGA |
| 654 |       | 0,0,0,0,0           |          |
| 655 | 15_1  | 0,0,0,0,0,0,0,0,0,0 | ATATGAGA |
| 656 |       | 0,0,0,0,0,0,0,0,0,0 |          |
| 657 | 15_2  | 0,0,0,0,0,0,0,0,0,0 | ATGGGAGA |
| 658 |       | 0,0,0,0,0,0,0,0,0,0 |          |
| 659 | 15_3  | 0,0,0,0,0,0,0,0,0,0 | GATTGTAA |
| 660 |       | 0,0,0,0,0,0,0,0,0,0 |          |
| 661 | 15_4  | 0,0,0,0,0,0,1,0,1,1 | ATAGGGAA |
| 662 |       | 0,0,0,0,0,1,1,0,1,1 |          |
| 663 | 15_5  | 0,0,0,0,0,0,1,0,0,0 | TTGAAGAT |
| 664 |       | 0,0,0,0,0,0,1,0,1,1 |          |
| 665 | 15_6  | 0,0,0,0,0,0,0,0,0,0 | TGGTTAAA |
| 666 |       | 0,0,0,0,0,0,0,0,0,0 |          |
| 667 | 15_7  | 0,0,0,0,0,0,0,0,0,0 | TAAAGAAA |
| 668 |       | 0,0,0,0,0,0,0,0,0,0 |          |
| 669 | 15_8  | 0,0,0,0,0,0,0,0,0,0 | TATTTTTT |
| 670 |       | 0,0,0,0,0,0,0,0,0,0 |          |
| 671 | 15_9  | 0,0,0,0,0,0,0,0,0,0 | TGTATGTA |
| 672 |       | 0,0,0,0,0,0,0,0,0,0 |          |
| 673 | 15_10 | 0,0,1,0,0,0,0,0,0,0 | AAGTAAAG |
| 674 |       | 0,0,0,0,0,0,0,0,0,0 |          |
| 675 | 15_11 | 1,1,0,0,0,0,1,0,0,0 | AAAATTGA |
| 676 |       | 1,1,0,0,0,0,1,0,1,1 |          |
| 677 | 15_12 | 0,0,0,0,0,0,0,0,0,0 | GTGTGGGG |
| 678 |       | 0,0,0,0,0,0,0,0,0,0 |          |
| 679 | 15_13 | 0,1,0,0,0,0,0,0,0,0 | TAGTTGGA |
| 680 |       | 0,1,0,0,0,0,0,0,0,0 |          |
| 681 | 15_14 | 1,1,1,1,1,0,0,0,0,1 | AATGTAAA |
| 682 |       | 1,1,1,1,0,0,0,0,0,1 |          |
| 683 | 15_15 | 0,0,0,0,0,0,0,0,0,0 | TTGGTAGG |
| 684 |       | 0,0,0,0,0,0,0,0,0,0 |          |
| 685 | 15_16 | 0,0,0,0,1,0,0,0,0,1 | GTATTATG |
| 686 |       | 0,0,0,0,0,0,1,0,1,1 |          |
| 687 | 30_1  | 0,0,0,0,0,0,0,0,0,0 | ATAAGGGA |
| 688 |       | 0,0,0,0,0,0,0,0,0,0 |          |
| 689 | 30_2  | 0,0,0,0,0,0,0,0,0,1 | TTTTTAGA |
| 690 |       | 0,0,0,0,0,0,0,0,0,0 |          |
| 691 | 30_3  | 0,0,0,0,0,0,0,0,0,1 | TTGTGATA |
| 692 |       | 0,0,0,0,0,0,0,0,0,1 |          |
| 693 | 30_4  | 0,0,0,0,0,0,0,0,0,0 | TATAATTA |
| 694 |       | 0,0,0,0,0,0,0,0,0,0 |          |

|     |       |                   |          |
|-----|-------|-------------------|----------|
| 695 | 30_5  | 0,0,0,0,1,0,0,0,0 | GAGTAATT |
| 696 |       | 0,0,0,0,1,0,0,0,0 |          |
| 697 | 30_6  | 0,0,0,0,0,0,0,0,0 | TGAGTGAG |
| 698 |       | 0,0,0,0,0,0,0,0,0 |          |
| 699 | 30_7  | 0,0,0,0,1,0,0,0,0 | GGTGAATG |
| 700 |       | 0,0,0,0,0,0,0,0,0 |          |
| 701 | 30_8  | 0,0,0,0,0,0,0,0,0 | TGGAATA  |
| 702 |       | 0,0,0,0,0,0,0,0,0 |          |
| 703 | 30_9  | 0,0,0,0,0,0,0,0,0 | TTTTTGGA |
| 704 |       | 0,0,0,0,0,0,0,0,0 |          |
| 705 | 30_10 | 0,0,0,0,0,0,1,0,1 | GGTAAGTA |
| 706 |       | 0,0,0,0,1,0,1,0,1 |          |
| 707 | 30_11 | 0,0,0,0,0,0,1,0,1 | GATAAAAG |
| 708 |       | 0,0,0,0,0,0,0,0,1 |          |
| 709 | 30_12 | 0,0,0,1,1,0,0,0,0 | TTAATAGG |
| 710 |       | 0,1,0,1,0,0,0,1,0 |          |
| 711 | 30_13 | 0,0,0,0,0,0,0,0,0 | AAGGTTTG |
| 712 |       | 0,0,0,0,0,0,0,0,0 |          |
| 713 | 30_14 | 0,0,0,0,0,0,0,0,0 | AGTTGGAG |
| 714 |       | 0,0,0,0,0,0,0,0,0 |          |
| 715 | 30_15 | 0,0,0,0,0,0,0,0,0 | TAAAGTAG |
| 716 |       | 0,0,0,0,0,0,0,0,0 |          |
| 717 | 30_16 | 0,0,0,0,0,0,1,0,1 | TTTTTAGA |
| 718 |       | 0,0,0,0,0,0,0,0,0 |          |
| 719 | 30_17 | 0,0,0,0,0,0,0,0,0 | TTAATTGA |
| 720 |       | 0,0,0,0,0,0,0,0,0 |          |
| 721 | 30_18 | 0,0,0,0,0,0,0,0,0 | TGGTTAAT |
| 722 |       | 0,0,0,0,0,0,0,0,0 |          |
| 723 | 30_19 | 0,0,0,1,0,0,0,0,0 | ATGTTGTG |
| 724 |       | 0,0,0,0,0,0,0,0,0 |          |
| 725 | 30_20 | 0,0,0,0,0,0,0,0,0 | TGAAAGAT |
| 726 |       | 0,0,0,0,0,0,0,0,0 |          |
| 727 | 30_21 | 0,0,0,0,0,0,0,0,0 | AGTAAGTG |
| 728 |       | 0,0,0,0,0,0,0,0,0 |          |
| 729 | 30_22 | 0,0,0,0,0,0,0,0,0 | TTTTTAGA |
| 730 |       | 0,0,0,0,0,0,0,0,0 |          |
| 731 | 30_23 | 0,0,0,0,0,0,0,0,1 | AAATGGGT |
| 732 |       | 0,0,0,0,0,0,0,0,0 |          |
| 733 | 31_1  | 0,1,0,0,0,1,0,0,0 | GGATTAGA |
| 734 |       | 0,1,0,0,0,1,0,0,0 |          |
| 735 | 31_2  | 0,0,0,0,0,1,1,1,1 | TGAGTAAA |
| 736 |       | 0,0,0,0,0,1,1,1,1 |          |
| 737 | 31_3  | 0,0,0,1,0,0,1,1,1 | TAGAGAGA |
| 738 |       | 0,0,0,1,0,0,1,1,1 |          |
| 739 | 31_4  | 0,0,0,0,0,0,0,0,0 | TTTATAAT |
| 740 |       | 0,0,0,0,0,0,0,0,0 |          |
| 741 | 31_5  | 1,1,0,0,0,0,1,0,0 | AGATATAG |
| 742 |       | 1,1,0,0,0,0,1,0,0 |          |
| 743 | 31_6  | 0,0,0,0,0,0,0,0,0 | AAATAAAA |
| 744 |       | 0,0,0,0,0,0,0,0,0 |          |
| 745 | 6_1   | 0,0,0,0,0         | ATTGTTGA |
| 746 |       | 0,0,0,0,0         |          |
| 747 | 6_2   | 0,0,1,0,0         | TTGGGAAT |
| 748 |       | 0,0,0,0,0         |          |
| 749 | 6_3   | 0,0,0,0,0         | TTAAGATG |
| 750 |       | 0,0,0,0,0         |          |
| 751 | 6_4   | 0,1,0,1,1         | GTAGGGGG |
| 752 |       | 0,1,0,1,1         |          |
| 753 | 6_5   | 0,0,0,0,0         | GGTAGGAT |
| 754 |       | 0,0,0,0,0         |          |
| 755 | 8_1   | 0,0,1,1,0         | TATTGGAG |
| 756 |       | 0,0,1,1,0         |          |
| 757 | 8_2   | 0,0,0,0,0         | GTTTGTAT |
| 758 |       | 0,0,0,0,0         |          |
| 759 | 8_3   | 0,0,0,0,0         | GTGTTGT  |
| 760 |       | 0,0,0,0,0         |          |
| 761 | 8_4   | 0,0,0,0,0         | TAGGGGAT |
| 762 |       | 0,0,0,0,0         |          |
| 763 | 8_5   | 0,0,1,0,1         | TATTAAAG |
| 764 |       | 0,0,1,0,1         |          |
| 765 | 8_6   | 0,0,0,0,0         | GTAGGTGG |
| 766 |       | 0,0,0,1,0         |          |
| 767 | 8_7   | 1,0,1,1,1         | GTAGAGGG |
| 768 |       | 1,0,1,1,1         |          |
| 769 | 8_8   | 0,0,0,0,0         | AAAATATA |
| 770 |       | 0,0,0,0,0         |          |
| 771 | 8_9   | 0,0,0,0,0         | GTTTTTGT |
| 772 |       | 0,0,0,0,0         |          |

|     |      |           |          |
|-----|------|-----------|----------|
| 773 | 8_10 | 0,0,0,0,0 | GAGGTTAT |
| 774 |      | 0,0,0,0,1 |          |
| 775 | 8_11 | 0,0,0,0,0 | TGTAGGAA |
| 776 |      | 0,0,0,0,0 |          |
| 777 | 8_12 | 0,0,1,1,1 | AATTFGTT |
| 778 |      | 0,0,1,1,1 |          |
| 779 | 8_13 | 0,0,0,0,0 | AAGTTTAT |
| 780 |      | 0,0,0,0,0 |          |
| 781 | 8_14 | 0,0,0,0,0 | TGGATTTG |
| 782 |      | 0,0,0,0,0 |          |
| 783 | 8_15 | 0,0,0,0,0 | TATTAGGT |
| 784 |      | 0,0,1,1,1 |          |
| 785 | 8_16 | 0,0,0,0,0 | TATTGGAT |
| 786 |      | 0,0,0,0,0 |          |
| 787 | 8_17 | 0,0,0,0,0 | AATTGGGT |
| 788 |      | 0,0,0,0,0 |          |
| 789 | 8_18 | 0,0,0,0,0 | TGTTGTAA |
| 790 |      | 0,0,0,0,0 |          |
| 791 | 8_19 | 0,0,1,0,1 | AGGATATA |
| 792 |      | 0,0,1,0,1 |          |
| 793 | 8_20 | 0,0,1,0,0 | AGTTAGGT |
| 794 |      | 0,0,1,0,0 |          |
| 795 | 8_21 | 0,0,0,0,0 | TTAGTAAG |
| 796 |      | 0,0,0,0,0 |          |
| 797 | 8_22 | 0,0,1,1,1 | GAATTTGT |
| 798 |      | 0,0,1,1,1 |          |
| 799 | 8_23 | 0,0,0,0,0 | GAAATGGA |
| 800 |      | 0,0,0,0,0 |          |
| 801 | 8_24 | 0,0,0,0,0 | GTTGTTAA |
| 802 |      | 0,0,0,0,0 |          |
| 803 | 8_25 | 1,0,1,1,1 | TTTTGGGT |
| 804 |      | 0,0,0,0,0 |          |
| 805 | 8_26 | 0,0,0,0,0 | GATAAGGG |
| 806 |      | 0,0,0,0,0 |          |
| 807 | 8_27 | 0,0,0,0,0 | GGAAGTTG |
| 808 |      | 0,0,0,0,0 |          |
| 809 | 8_28 | 0,1,1,1,1 | AGTAATGT |
| 810 |      | 0,1,1,1,1 |          |
| 811 | 8_29 | 0,0,0,0,0 | AAATGGGT |
| 812 |      | 0,0,0,0,0 |          |
| 813 | 8_30 | 0,0,0,0,0 | AGTTFGGT |
| 814 |      | 0,0,0,0,0 |          |
| 815 | 8_31 | 0,0,0,0,0 | GAGATTTT |
| 816 |      | 0,0,0,0,0 |          |
| 817 |      |           |          |
| 818 |      |           |          |
| 819 |      |           |          |
